# Supplementary material
Source: publisher site journal article supplement (https://www.degruyterbrill.com/publication/journal_key/JNCDS/downloadAsset/JNCDS_LaTeX-Template.zip)
Supplement: Supplementary file 1 [file journal-article.pdf › TEME_tm_LaTeX-template/journal-article.pdf]

## Research Article

First Author\*, Second Author, and Third Author

# Insert your title here

<https://doi.org/10.1515/sample-YYYY-XXXX>

Received Month DD, YYYY; revised Month DD, YYYY; accepted Month DD, YYYY

**Abstract:** Please insert your abstract here (approx. 200 words). Remember that online systems rely heavily on the content of titles and abstracts to identify articles in electronic bibliographic databases and search engines. Abstracts give a clear indication of the nature and the range of the results in the paper.

**Keywords:** Please insert your keywords here, separated by commas.

## 1 Introduction

Found a journal in which you would like to publish? Then we suggest going to the journal's website and reading the information on the submission form. Please follow our specifications for guidance with creating and formatting your manuscript. In each journal's supplementary pages, you will find the current impact factor and additional information about the journal.

Many journals accept manuscript submissions through the online systems ScholarOne Manuscripts and Editorial Manager. This saves you time and speeds up the publication process. Journals without a submission system of this type can be contacted via the relevant product page.

More information can be found at <https://www.degruyter.com/page/authors>.

### 1.1 General information

Manuscripts should be written in clear and concise English. Please have your text proofread by an English native speaker before you submit it for consideration. At the proof stage, only minor changes and corrections are allowed.

The **Introduction** to the manuscript should contain a clear definition of the problem being considered. Wherever possible theoretical results should be cited. The use of SI units is required.

## 2 Layout of manuscripts

### 2.1 Equations and theorem-like environments

**Equations** should be well-aligned and should not be crowded (??). Only Latin and Greek alphabets are to be used. Complicated superscripts and subscripts should be avoided by introducing new symbols. Avoid repetition of a complicated expression by representing it with a symbol.

$$k_{n+1} = n^2 + k_n^2 - k_{n-1}$$

$$f(x) = (x + a)(x + b) \quad (1)$$

---

\*Corresponding author: **First Author**, Institution, Department, City, Country of first author, e-mail: [author\\_one@xx.yz](mailto:author_one@xx.yz)  
**Second Author**, **Third Author**, Institution, Department, City, Country of second author and third author, e-mail: [author\\_two@xx.yz](mailto:author_two@xx.yz), [author\\_three@xx.yz](mailto:author_three@xx.yz)

New theorem-like environments will be introduced by using the commands `\theoremstyle` and `\newtheorem`. Please note that the environments `proof` and `definition` are already defined within `dgruyter.sty`.

**Definition 1.** This is a definition environment.

**Theorem 1.** *This is a theorem environment.*

*Proof.* This is a proof environment. □

## 2.2 Figures and Tables

The number of **Figures** should be limited to the absolute minimum. Images must be of good contrast and sufficiently high resolution for reproduction (minimum 600 dpi). Lettering of all figures should be uniform in style. Authors are encouraged to submit illustrations in color if necessary for their scientific content. Publication of color figures is provided free of charge both in online and print editions.

When drawing bar graphs, use patterning/color instead of grey scales (faint shading may be lost upon reproduction). Each figure should be uploaded separately as .jpg-, .eps-, .pdf- or .tiff-file. The legends for the figures must be concise and self-explanatory. The key to the symbols in the figures should be included in the figure where possible. Otherwise, they should be included in the legend.

A concise, self-explanatory caption should appear below **Figures and Tables**. Each table should be placed on a separate manuscript page including its caption. All figures and tables should be numbered and referred to in your document as Table 1 or Figure 1 (e.g. “See Table ??”, “As Figure 2 indicates” etc.).

**Tab. 1:** Sample table with header.

| Table head 1 | Table head 2 | Table head 3 |
|--------------|--------------|--------------|
| 10           | 40           | text A       |
| 20           | 50           | text B       |
| 30           | 60           | text C       |

**Tab. 2:** Sample table without header.

| First column | Second column | Third column | Fourth column |
|--------------|---------------|--------------|---------------|
| 1            | 2             | 3            | 4             |
| 4            | 5             | 6            | 7             |
| 8            | 9             | 11           | 12            |

## 2.3 References

Please refer to the journal’s website for more information on the reference style. Sample references can be found here: [?] and [? ? ? ? ?]. All references should be collected at the end of the paper.

## 3 Manuscript processing

The **evaluation process** varies from journal to journal.

- Single-blind review: the reviewers remain anonymous to the authors.

- Double-blind review: the reviewers do not know who the authors are, nor do the authors know who has evaluated their manuscript.

Typically, at least two independent experts are invited to review a manuscript's content. The manuscript is then either accepted, rejected, or returned for revision based on their evaluation.

With many journals, you can propose reviewers who come from outside of your closest areas of academia. It is at the editors' discretion whether to accept these proposals.

**Galley proofs:** Before your contribution is published, you will receive a proof of the article to proofread. At this point in the publication process, there must be no more changes made to the content: only minor corrections in form and phrasing are possible.

**Acknowledgment:** Please insert acknowledgments of the assistance of colleagues or similar notes of appreciation here.

**Funding:** Please insert information concerning research grant support here (institution and grant number). Please provide for each funder the funder's DOI according to <https://doi.crossref.org/funderNames?mode=list>.

## References

- [1] A. Carbonaro, G. Metafune and C. Spina, "Parabolic Schrödinger operators," *J. Math. Anal. Appl.*, vol. 343, pp. 965–974, 2018.
- [2] D. Farley and L. Sabalka, "Presentations of graph braid groups," *Forum Math.*, Oct. 2010, doi:10.1515/forum.2011.086.
- [3] S. A. Antonyan and T. Dobrowolski, "Locally contractible coset spaces," *Forum Math.*, in press.
- [4] Z.-Q. Chen and L. Wang, "Uniqueness of stable processes with drift," preprint, 2013. Available at: <http://arxiv.org/pdf/1309.6414v1>.
- [5] K. H. Hofmann and S. A. Morris, *The Structure of Compact Groups*, 3rd ed., De Gruyter Stud. Math. 25, Berlin, De Gruyter, 2013.
- [6] W.-A. Yong, "Basic aspects of hyperbolic relaxation systems," in *Advances in the Theory of Shock Waves, Progr. Nonlinear Differential Equations Appl.* 47, Boston, Birkhäuser, 2001, pp. 259–305.
- [7] J. D. King, "Thesis title," Ph.D. dissertation, Dept. Elect. Eng., Harvard Univ., Cambridge, MA, USA, 1995.
- [8] B. Hay, "Drone tourism: a study of the current and potential use of drones in hospitality and tourism," in *CAUTHE 2016: the changing landscape of tourism and hospitality: the impact of emerging markets and emerging destinations*, Sydney, Australia, Publisher Name, 2016, pp. 49–68.
